# Supplementary material for: TRPML1-Induced Lysosomal Ca2+ Signals Activate AQP2 Translocation and Water Flux in Renal Collecting Duct Cells
Source: MDPI journal article supplement (doi:10.3390/ijms24021647), 2023-01-13
Supplement: s1 [file s1]

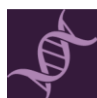

*Supplementary Materials*

# TRPML1-Induced Lysosomal $\text{Ca}^{2+}$ Signals Activate AQP2 Translocation and Water Flux in Renal Collecting Duct Cells

Simona Ida Scorza <sup>1,†</sup>, Serena Milano <sup>1,†</sup>, Ilenia Saponara <sup>1</sup>, Maira Certini <sup>1</sup>, Roberta De Zio <sup>1</sup>, Maria Grazia Mola <sup>1</sup>, Giuseppe Procino <sup>1</sup>, Monica Carmosino <sup>2</sup>, Francesco Moccia <sup>3</sup>, Maria Svelto <sup>1</sup> and Andrea Gerbino <sup>1,\*</sup>

<sup>1</sup> Department of Biosciences, Biotechnologies and Environment, University of Bari Aldo Moro, 70125 Bari, Italy

<sup>2</sup> Department of Sciences, University of Basilicata, 85100 Potenza, Italy

<sup>3</sup> Department of Biology and Biotechnology Lazzaro Spallanzani, University of Pavia, 27100 Pavia, Italy

\* Correspondence: andrea.gerbino@uniba.it; Tel.: +39-0805443334

† These authors contributed equally to this work.

**Citation:** Scorza, S. I.; Milano, S.; Saponara, I.; Certini, M.; De Zio, R.; Mola, M.G.; Procino, G.; Carmosino, M.; Moccia, F.; Svelto, M.; et al. TRPML1-Induced Lysosomal  $\text{Ca}^{2+}$  Signals Activate AQP2 Translocation and Water Flux in Renal Collecting Duct Cells. *Int. J. Mol. Sci.* **2023**, *24*, 1647. <https://doi.org/10.3390/ijms24021647>

Academic Editor: Frank Thévenod

Received: 5 December 2022

Revised: 4 January 2023

Accepted: 11 January 2023

Published: 13 January 2023

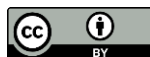

**Copyright:** © 2023 by the authors. Licensee MDPI, Basel, Switzerland. This article is an open access article distributed under the terms and conditions of the Creative Commons Attribution (CC BY) license (<https://creativecommons.org/licenses/by/4.0/>).

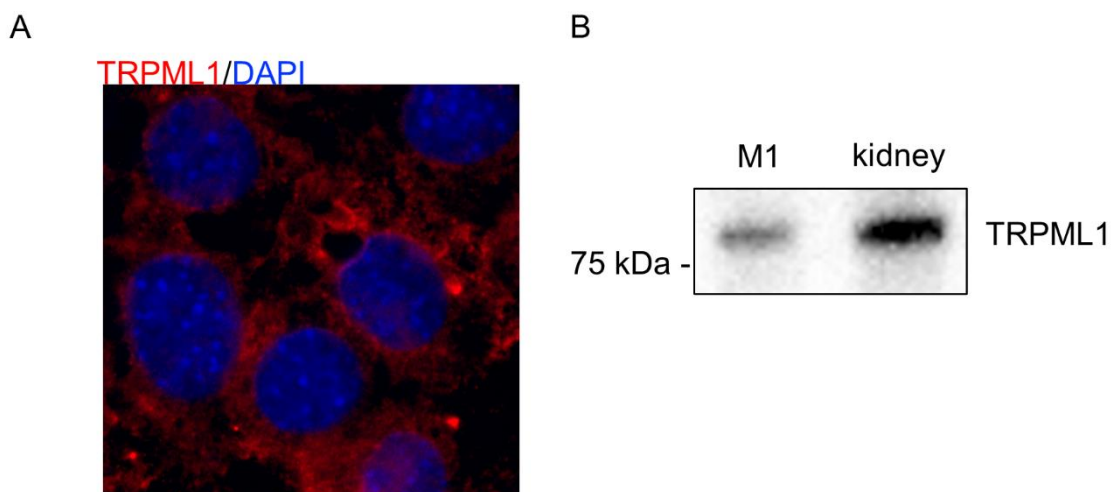

**Figure S1.** M1 cells express the lysosomal cation channel TRPML1. A) Representative immunofluorescence acquisition of the cation channel TRPML1 (red) merged with the nuclear dye DAPI (blue). B) Western blotting analysis of TRPML1 on M1 cells lysates (left) and total kidney homogenates (right).

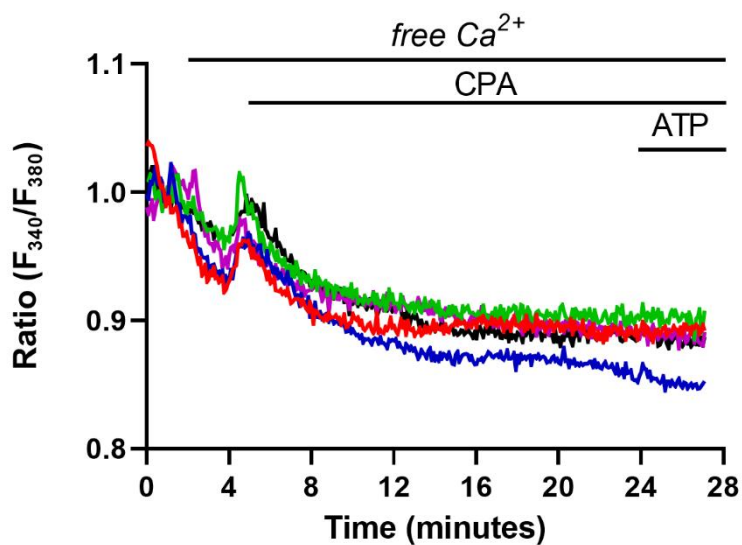

**Figure S2.** Pre-treatment with CPA empties the  $Ca^{2+}$  content of the ER.  $Ca^{2+}$  response of M1 cells loaded with Fura-2 to the addition of the  $Ca^{2+}$  mobilizing agent 100  $\mu$ M ATP after 20 min pre-treatment with 40  $\mu$ M CPA in free  $Ca^{2+}$  condition ( $n = 109/118$  responsive cells,  $m = 3$  experiments). Graph shows 5 representative traces.
